# Supplementary material for: Notochordal-Cell-Derived Exosomes Induced by Compressive Load Inhibit Angiogenesis via the miR-140-5p/Wnt/β-Catenin Axis
Source: PubMed Central journal article supplement — Mol Ther Nucleic Acids. 2020 Oct 22;22:1092–106. doi: 10.1016/j.omtn.2020.10.021 (PMC7691158; doi:10.1016/j.omtn.2020.10.021), 2020-10-22
Supplement: mmc1.pdf [file mmc1.pdf]

OMTN, Volume 22

## Supplemental Information

### **Notochordal-Cell-Derived Exosomes Induced by Compressive Load Inhibit Angiogenesis via the miR-140-5p/Wnt/ $\beta$ -Catenin Axis**

**Zhen Sun, Bing Liu, Zhi-Heng Liu, Wen Song, Dong Wang, Bei-Yu Chen, Jing Fan, Zhe Xu, Dan Geng, and Zhuo-Jing Luo**

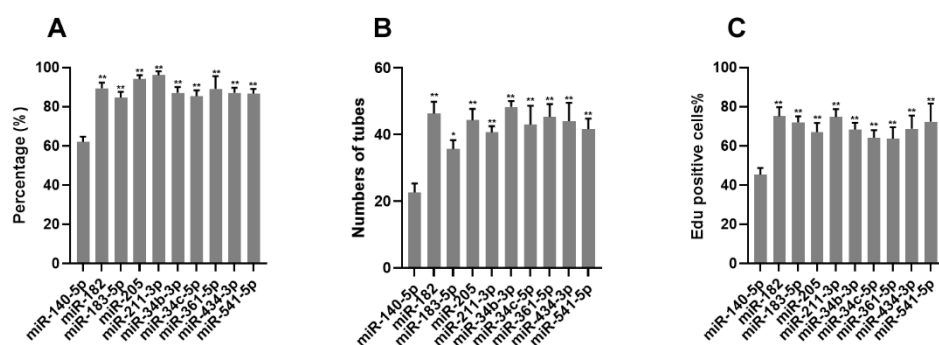

**Figure S1. Effect of upregulated miRNAs of 0.5MPa/NCs-exos on angiogenesis. (A)** Effect of upregulated miRNAs on migration of HUVECs. Mean±SEM are provided (n=3). \*p<0.05, \*\*p <0.01 for comparison with miR-140-5p group. **(B)** Effect of upregulated miRNAs on tube formation ability of HUVECs. Mean±SEM are provided (n=3). \*p<0.05, \*\*p<0.01 for comparison with miR-140-5p group. **(C)** Effect of upregulated miRNAs on proliferation of HUVECs. Mean±SEM are provided (n=3). \*p<0.05, \*\*p<0.01 for comparison with miR-140-5p group. NCs-exos: notochordal cells-derived exosomes.

**Table S1 Primer sequences used in quantitative real-time polymerase chain reaction**

| Gene symbol | Forward primer          | Reverse primer         | GenBank ID |
|-------------|-------------------------|------------------------|------------|
| brachyury   | GAGTGGACCACCTGCTGAGC    | GGTGGATGTAGACGCAGCTG   | 292301     |
| miR-140-5p  | GAGTGTCAGTGGTTTTACCCT   | GCAGGGTCCGAGGTATTC     | 406932     |
| miR-U6      | GGAACGATACAGAGAAGATTAGC | TGGAACGCTTCACGAATTTGCG | 26827      |

**Table 2 Sequences of synthetic miR140-5p mimic/inhibitor**

| Gene symbol          | Sequences (5'-3')                            |
|----------------------|----------------------------------------------|
| miR-140-5p mimic     | CAGUGGUUUUACCCUAUGGUAGACCAUAGGGUAAAACCACUGUU |
| miR-140-5p inhibitor | AACCCAUGGAAUUCAGUUCUCA                       |
